# Supplementary material for: Metal Ions (Li, Mg, Zn, Ce) Doped into La2O3 Nanorod for Boosting Catalytic Oxidative Coupling of Methane
Source: MDPI journal article supplement (doi:10.3390/catal12070713), 2022-06-29
Supplement: s1 [file s1]

# Metal Ions (Li, Mg, Zn, Ce) Doped into $\text{La}_2\text{O}_3$ Nanorod for Boosting Catalytic Oxidative Coupling of Methane

Jing Xiong, Hongbin Yu, Yuechang Wei \*, Chengshu Xie, Kezhen Lai, Zhen Zhao and Jian Liu

State Key Laboratory of Heavy Oil Processing, College of Science, China University of Petroleum, Beijing, 102249, China; xiongjing@cup.edu.cn (J.X.); 18810896989@163.com (H.Y.); xiechengshu6@163.com (C.X.); laikezhen0207@163.com (K.L.); zhenzhao@cup.edu.cn (Z.Z.); liujian@cup.edu.cn (J.L.)

\* Correspondence: weiy@cup.edu.cn

## Experimental details

### Preparation of the catalysts.

The specific experimental process is as follows: accurately weigh four portions of 1.0000 g  $\text{La}(\text{NO}_3)_3 \cdot 6\text{H}_2\text{O}$  and add 50 ml deionized water to dissolve them, and then take 1 g  $\text{Li}(\text{NO}_3) \cdot 6\text{H}_2\text{O}$ ,  $\text{Mg}(\text{NO}_3)_2 \cdot 6\text{H}_2\text{O}$ ,  $\text{Zn}(\text{NO}_3)_2 \cdot 6\text{H}_2\text{O}$ ,  $\text{Ce}(\text{NO}_3)_2 \cdot 6\text{H}_2\text{O}$  and dissolve them in 10 ml deionized water respectively. Ensure complete dissolution. Take 2 ml of the metal-doped nitrate solution and add them to the  $\text{La}(\text{NO}_3)_3 \cdot 6\text{H}_2\text{O}$  aqueous solution, stir for 5 min. Then to prepare a 10%  $\text{NaOH}$  aqueous solution. Add dropwise to the above mixed solution, adjust the pH to 11.5, produce a white precipitate, and keep stirring for 10 min. The solution was transferred to the hydrothermal reactor and heated at  $160^\circ\text{C}$  for 12 h. The product was filtered and washed three times with deionized water and three times with absolute ethanol. Then dry in an oven at  $50^\circ\text{C}$  for 12 h. Then the product was calcined at  $800^\circ\text{C}$  under air conditions for 4 h. A series of catalyst in the form of a nanorod is obtained. The process is shown in Figure S1.

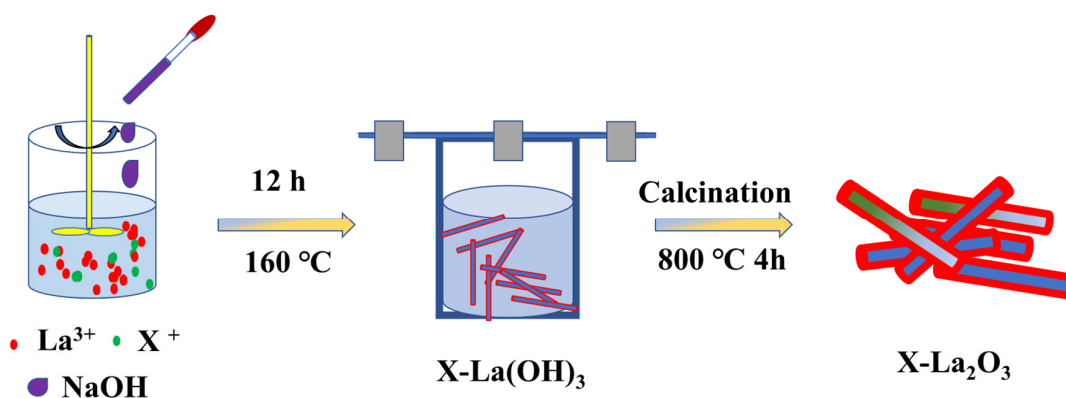

**Figure S1.** Schematic Process for the preparation of X-La<sub>2</sub>O<sub>3</sub> catalysts.

**Table S1.** Reagents applied for preparation of catalysts.

| Reagent                                              | Manufacturer | Purity    | Specification | Area    |
|------------------------------------------------------|--------------|-----------|---------------|---------|
| La(NO <sub>3</sub> ) <sub>3</sub> ·6H <sub>2</sub> O | innocem      | 99.90%    | 500 g         | Beijing |
| NaOH                                                 | Xi long      | AR        | 500g          | Beijing |
| Li(NO <sub>3</sub> )·6H <sub>2</sub> O               | An nai ji    | 99%       | 500g          | Beijing |
| Mg(NO <sub>3</sub> ) <sub>2</sub> ·6H <sub>2</sub> O | innocem      | 99%       | 100g          | Beijing |
| Zn(NO <sub>3</sub> ) <sub>2</sub> ·6H <sub>2</sub> O | Aladdin      | AR,98%    | 500g          | Beijing |
| Ethanol absolute                                     | An nai ji    | AR        | 5L            | Beijing |
| Ce(NO <sub>3</sub> ) <sub>2</sub> ·6H <sub>2</sub> O | MACKLIN      | AR 99.9%  | 100g          | Beijing |
| Deionized water                                      | Luo en       | Deionized | 2L            | Beijing |
| Silica sand                                          | Feng fan     | AR        | 500g          | Beijing |

### Catalyst activity evaluation

The OCM test was performed on a fixed-bed tubular quartz microreactor with an inner diameter of 6 mm and a length of 450 mm. The catalyst bed was placed between the quartz wool plugs in the reactor. The reaction temperature is accurately measured by a thermocouple placed in the middle of the catalyst bed. Under the total flow rate of CH<sub>4</sub>:O<sub>2</sub>:N<sub>2</sub>=3:1:13 reaction gas (50 mL min<sup>-1</sup>), treat the ground catalyst (100 mg) CH<sub>4</sub> for 1 h, heat up to 500°C, and heat from 500°C at a heating rate of 2 °C min<sup>-1</sup> to 800°C. The product gas is cooled by a self-refrigeration trap to achieve the purpose of removing water vapor. Use an online gas chromatograph (GC9890B, Beijing) with a flame ionization detector (FID) to monitor the concentration of CH<sub>4</sub>, C<sub>2</sub>H<sub>4</sub>, C<sub>2</sub>H<sub>6</sub>, C<sub>3</sub>H<sub>10</sub>, C<sub>3</sub>H<sub>8</sub>, CO and CO<sub>2</sub> outlet gas. Through a reasonable gas ratio and the flow rate of the reaction gas, a suitable reaction can be created for the reaction premise. All the above reaction conditions are obtained through a large number of literature studies and previous experimental verifications, and combined with the specific conditions of the laboratory, the most reasonable test conditions.

A kind of La<sub>2</sub>O<sub>3</sub> nano-particle catalysts were synthesized successfully by calcination method in our previous work. The nano-particle La<sub>2</sub>O<sub>3</sub> show the crystal facet of random distribution. Compared with nano-particle La<sub>2</sub>O<sub>3</sub>, nanorod La<sub>2</sub>O<sub>3</sub> exhibits much better catalytic performance for OCM reaction. So, it is proposed that the {110} crystal facet is beneficial for OCM reaction. The SEM (Figure S2) and catalytic tests (Figure S12) results are shown in Supporting Information. In addition, the La<sub>2</sub>O<sub>2</sub>CO<sub>3</sub> catalysts reported by Xia and coauthors put forward a series of La<sub>2</sub>O<sub>2</sub>CO<sub>3</sub> catalysts with different crystal facets. Wu and coauthors reported a kind of Au supported La<sub>2</sub>O<sub>3</sub>@La<sub>2</sub>O<sub>2</sub>CO<sub>3</sub> catalysts and they think the {110} crystal facets are more energetic. Combined with references and experimental results, we suggest that the exposed {110} crystal facets of La<sub>2</sub>O<sub>3</sub> nanorods play a crucial role for OCM reaction.

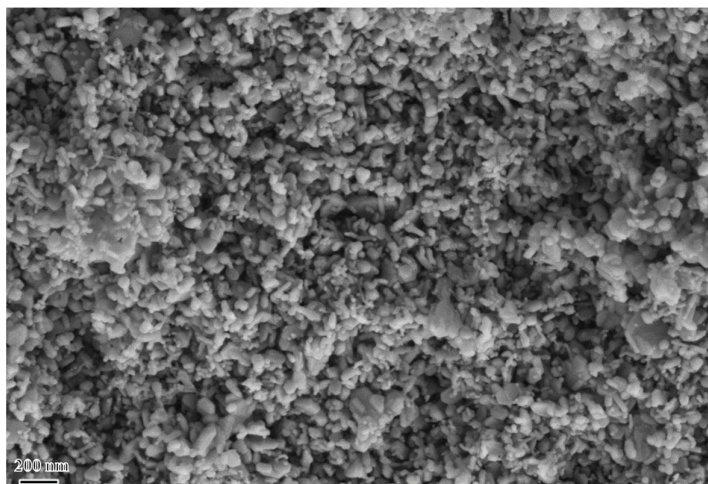**Figure S2.** SEM images of pure La<sub>2</sub>O<sub>3</sub> nanoparticles catalyst.

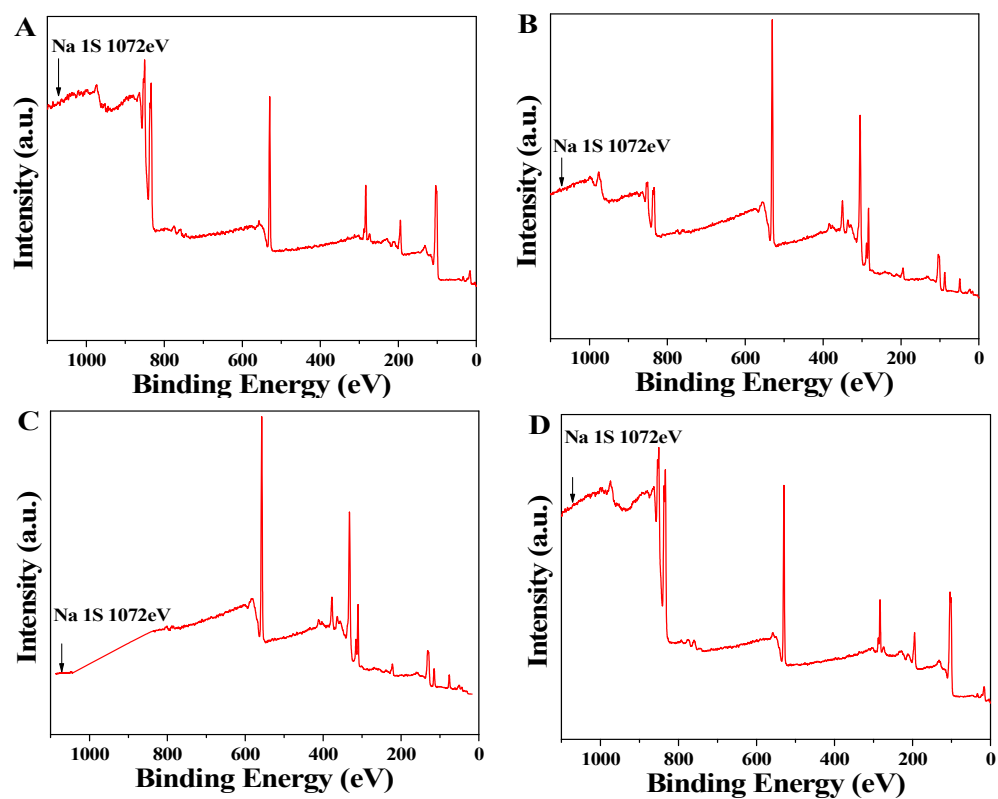

**Figure S3.** XPS survey spectrum (0-1100 eV) of X-LazO<sub>3</sub> catalysts. (A) Li-LazO<sub>3</sub>; (B) Mg-LazO<sub>3</sub>; (C) Zn-LazO<sub>3</sub>; (D) Ce-LazO<sub>3</sub>.

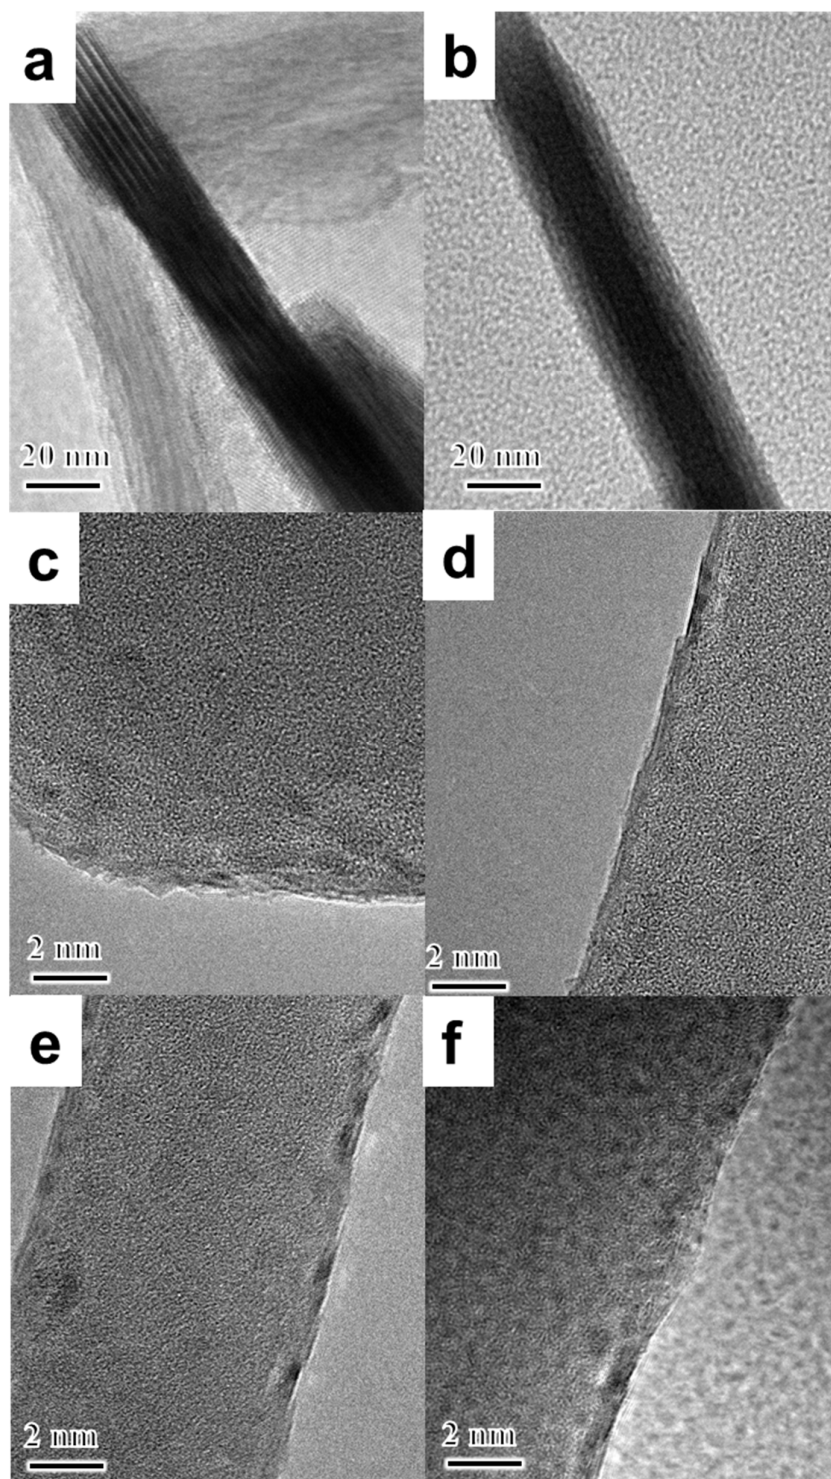

**Figure S4.** TEM Images of pure  $\text{La}_2\text{O}_3$  (a, b), Li-  $\text{La}_2\text{O}_3$  (c) Mg- $\text{La}_2\text{O}_3$  (d) catalyst.

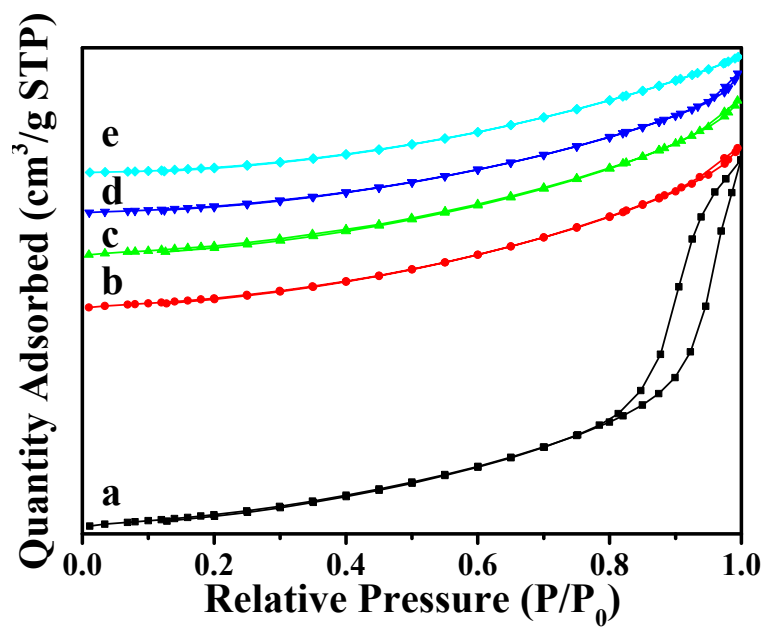

**Figure S5.** N<sub>2</sub> adsorption-desorption isotherms of the La<sub>2</sub>O<sub>3</sub> and X-La<sub>2</sub>O<sub>3</sub> catalysts. (a) La<sub>2</sub>O<sub>3</sub>; (b) Li-La<sub>2</sub>O<sub>3</sub>; (c) Mg-La<sub>2</sub>O<sub>3</sub>; (d) Zn-La<sub>2</sub>O<sub>3</sub>; (e) Ce-La<sub>2</sub>O<sub>3</sub>.

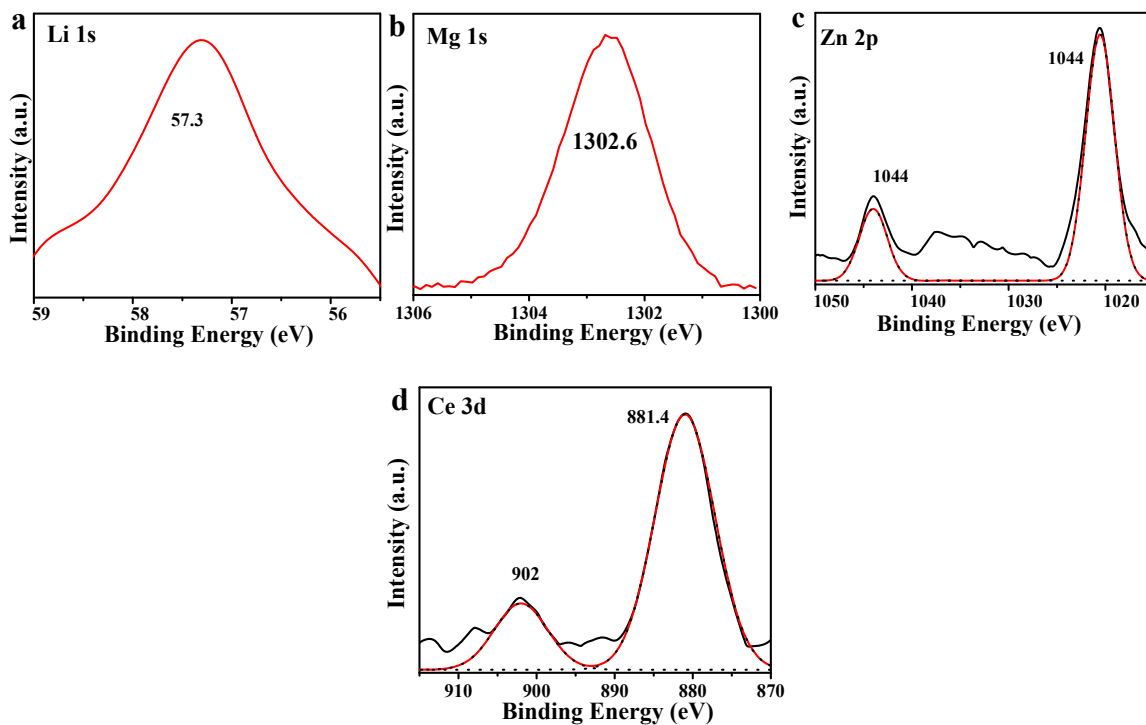

**Figure S6.** X-ray photoelectron spectra (XPS) of Li1s, Mg1s, Zn2p and Ce3d in X-La<sub>2</sub>O<sub>3</sub> catalysts. (a) Li-La<sub>2</sub>O<sub>3</sub>; (b) Mg-La<sub>2</sub>O<sub>3</sub>; (c) Zn-La<sub>2</sub>O<sub>3</sub>; (d) Ce-La<sub>2</sub>O<sub>3</sub>.

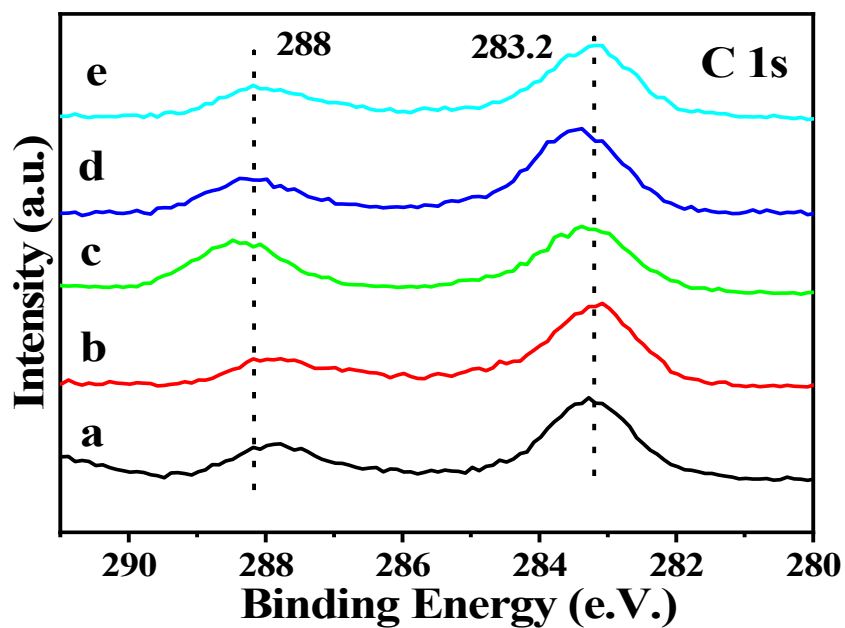

**Figure S7.** X-ray photoelectron spectra (XPS) of C1s over the  $\text{La}_2\text{O}_3$  and X- $\text{La}_2\text{O}_3$  catalysts. (a)  $\text{La}_2\text{O}_3$ ; (b)  $\text{Li-La}_2\text{O}_3$ ; (c)  $\text{Mg-La}_2\text{O}_3$ ; (d)  $\text{Zn-La}_2\text{O}_3$ ; (e)  $\text{Ce-La}_2\text{O}_3$ .

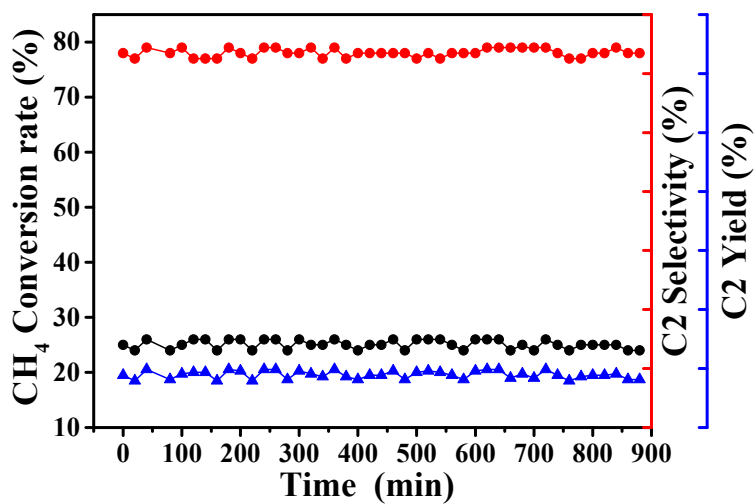

**Figure S8.** Stability test of the  $\text{Mg-La}_2\text{O}_3$  catalysts for OCM.

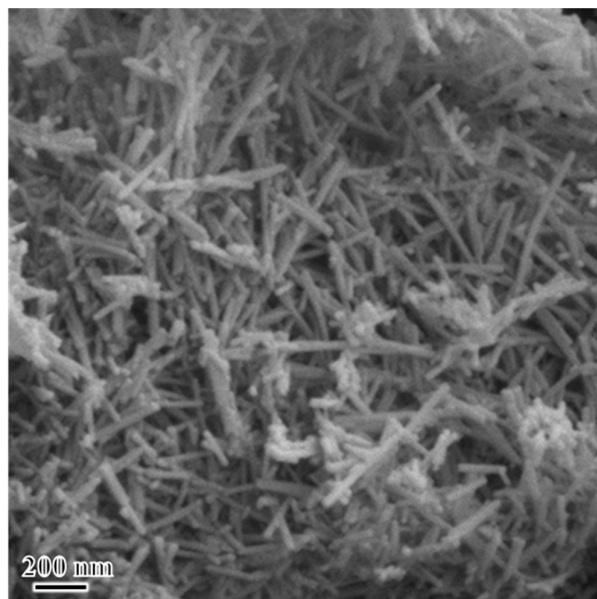

**Figure S9.** SEM images of Mg-LazO<sub>3</sub> catalyst used for 15 h during OCM reaction.

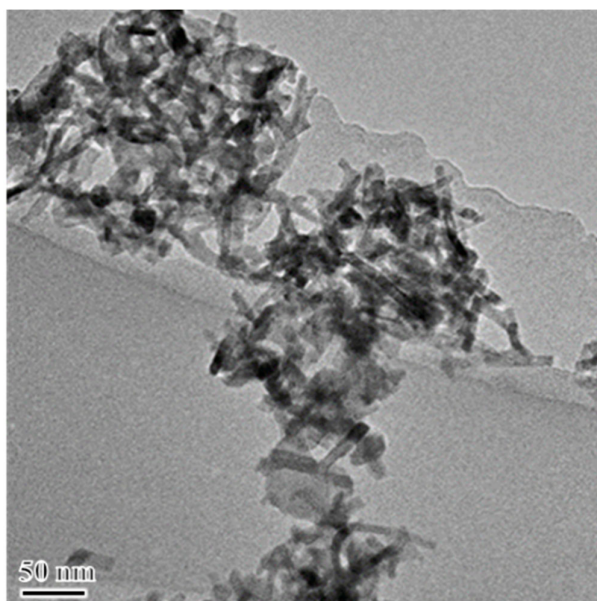

**Figure S10.** TEM Images of Mg-LazO<sub>3</sub> catalyst used for 15 h during OCM reaction.

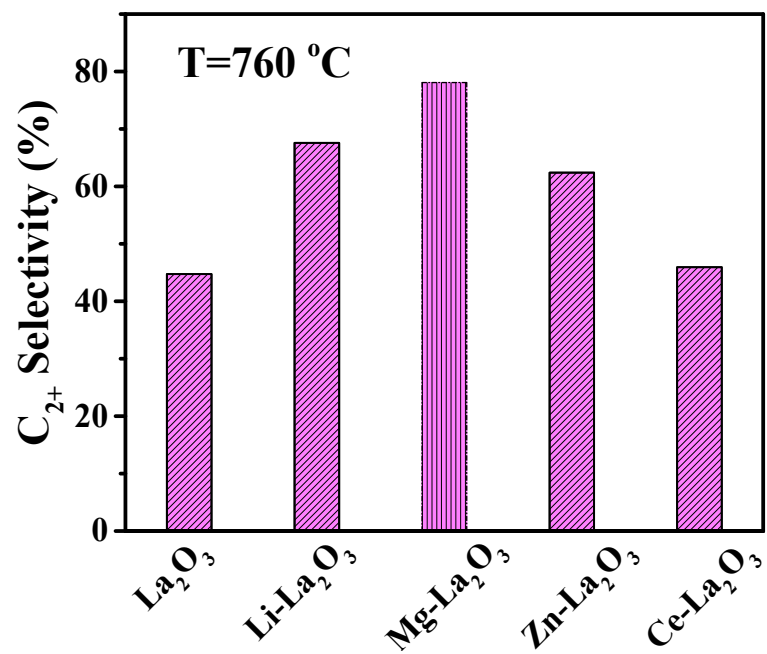

Figure S11. The selectivity of  $C_2$  products for OCM reaction over the  $\text{La}_2\text{O}_3$  and  $\text{X-La}_2\text{O}_3$  catalysts.

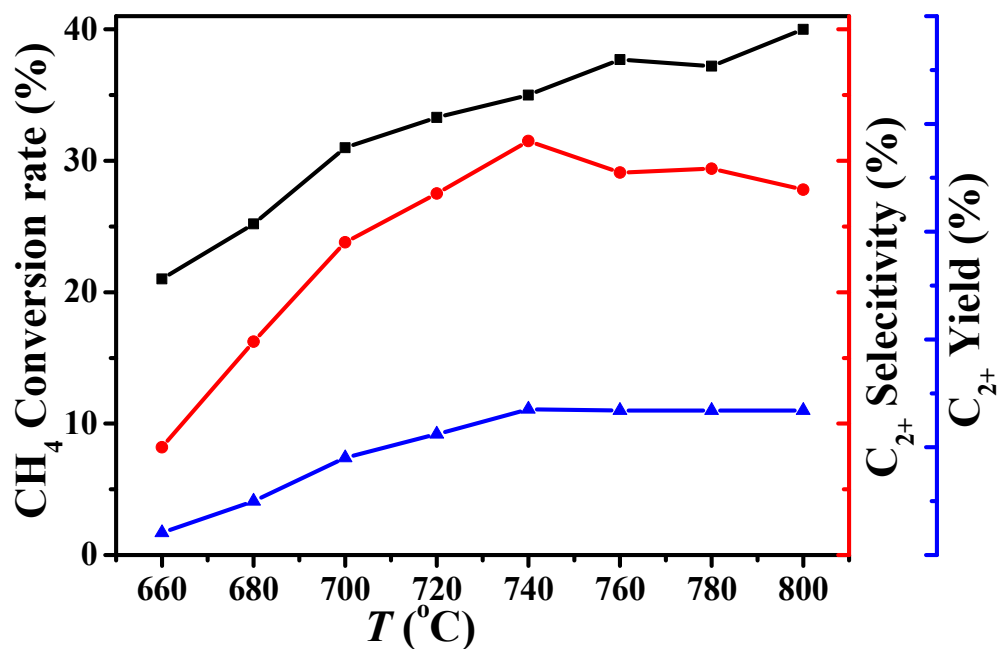

Figure S12. Catalyst performance of  $\text{La}_2\text{O}_3$  nanoparticles catalyst.
